# Supplementary material for: The perforant pathway and CA3-Schaffer collateral afferents coordinate to regulate spatial navigation
Source: Research Square preprint supplement (doi:10.21203/rs.3.rs-6519590/v1), 2025-05-16
Supplement: Supplementary file 1 [file dc4fb3c32b445b1afdb960ac.pdf]

A

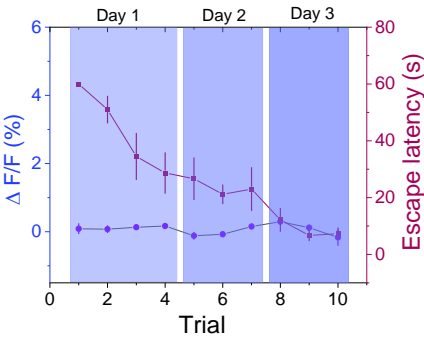

**Figure S1. Neural dynamics of CA3-SC afferents during spatial learning.**

**A.** Double Y curves depict the escape latency and  $\text{Ca}^{2+}$  responses of GFP-expressing mice during the spatial learning.

A

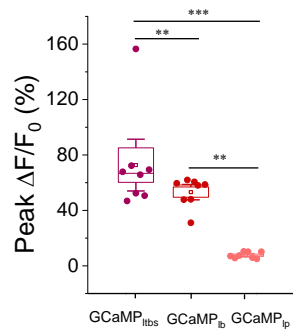

**Figure S2.** PP input activation potentiates CA3-SC afferent responses.

**A.** Statistic comparisons of the peak values of  $\text{Ca}^{2+}$  responses in three groups.

A

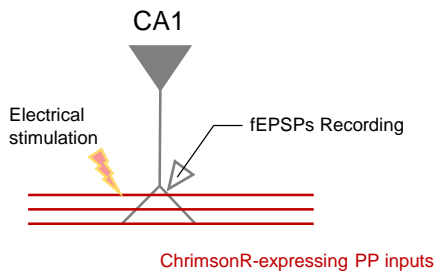

B

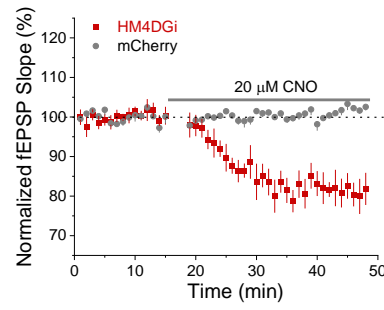

C

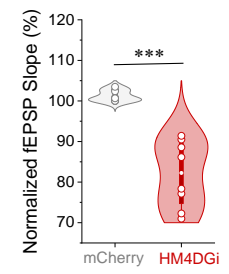

**Figure S3.** PP input inhibition attenuates CA3-SC afferent responses.

**A.** Schematic drawing depicts the experimental setup for recording the fEPSPs by electrical stimulation.

**B.** The fEPSPs was significantly decreased by CNO in HM4DG(i) group compared to the control.

**C.** Statistic comparison of the fEPSPs after perfusing with CNO in two groups.

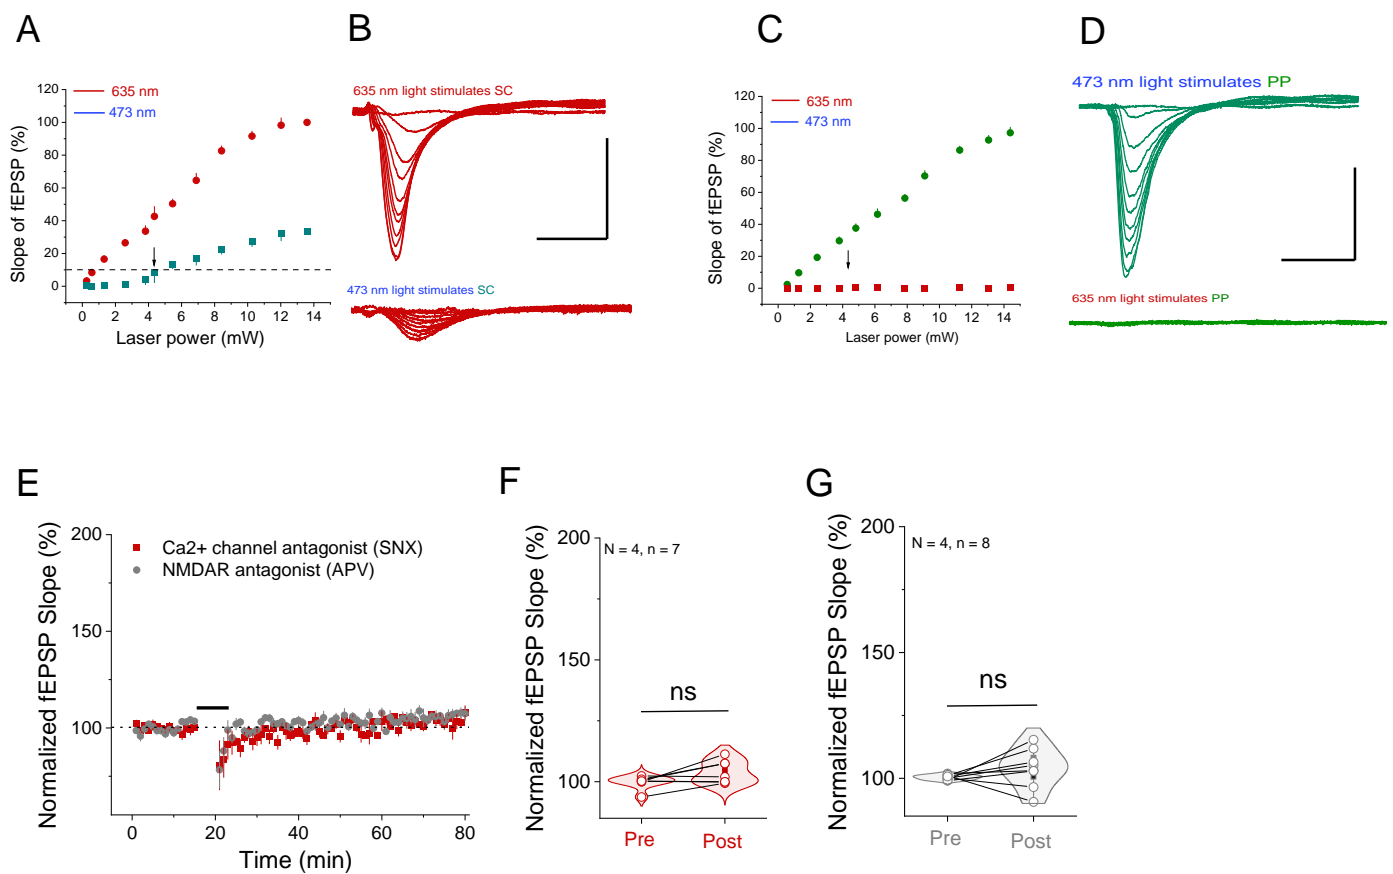

**Figure 4. Co-activation of CA3-SC and PP pathways induces heterosynaptic LTP in DHP.**

- A.** Various light intensity of 473 nm (green dots) /635 nm (red dots) light stimulates the ChrimsonR-expressing CA3-SC afferents in DHP.
- B.** Representative L- fEPSPs evoked by 473 nm (lower) /635 nm (upper) light, respectively. Scale bar: 0.5 mv/20 ms.
- C.** Various light intensity of 473 nm (green dots) /635 nm (red dots) light stimulates the Chronos-expressing PP terminals in DHP.
- D.** Representative L- fEPSPs evoked by 473 nm (upper) /635 nm (lower) light, respectively. Scale bar: 0.5 mv/20 ms.
- E.** Hetero-synaptic LTP was almost blocked by the NMDAR antagonist and Ca<sup>2+</sup> channel antagonist.
- F.** Statistic comparison of the L-fEPSPs before and after the L-TBS in brain sections with Ca<sup>2+</sup> channel antagonist (SNX).
- G.** Statistic comparison of the L-fEPSPs before and after the L-TBS in brain sections with NMDAR antagonist (APV).
